# Supplementary material for: Outcomes of Chemoimmunotherapy Among Patients With Extensive-Stage Small Cell Lung Cancer According to Potential Clinical Trial Eligibility
Source: PubMed Central journal article supplement — JAMA Netw Open. 2023 Feb 24;6(2):e230698. doi: 10.1001/jamanetworkopen.2023.0698 (PMC9958526; doi:10.1001/jamanetworkopen.2023.0698), 2023-02-24
Supplement: jamanetwopen-e230698-s001.pdf [file jamanetwopen-e230698-s001.pdf]

## Supplementary Online Content

Fujimoto D, Morimoto T, Tamiya M, et al. Outcomes of chemoimmunotherapy among patients with extensive-stage small cell lung cancer according to potential clinical trial eligibility. *JAMA Netw Open*. 2023;6(2):e230698.  
doi:10.1001/jamanetworkopen.2023.0698

**eTable 1.** Key Eligibility Criteria of Previous Pivotal Trials

**eTable 2.** Treatment-Related Adverse Events (AEs)

**eFigure 1.** Study Profile

**eFigure 2.** Kaplan-Meier Survival Curves: Progression-Free Survival and Overall Survival Stratified by Eligibility Criteria 2

**eFigure 3.** Kaplan-Meier Survival Curves: Progression-Free Survival and Overall Survival Stratified by Performance Status

**eFigure 4.** Kaplan-Meier Survival Curves: Progression-Free Survival and Overall Survival Stratified by Age

This supplementary material has been provided by the authors to give readers additional information about their work.

**eTable 1. Key eligibility criteria of previous pivotal trials**

|                                                                                                                                                                                                                                                                                                                                                                                                                                           |
|-------------------------------------------------------------------------------------------------------------------------------------------------------------------------------------------------------------------------------------------------------------------------------------------------------------------------------------------------------------------------------------------------------------------------------------------|
| <b>ECOG performance status of 0 or 1</b>                                                                                                                                                                                                                                                                                                                                                                                                  |
| <b>Patients without symptomatic central nervous system metastases<sup>a</sup></b>                                                                                                                                                                                                                                                                                                                                                         |
| <b>Adequate hematologic and end organ function defined by the following laboratory test findings</b><br><br>Absolute neutrophil count $\geq$ 1500 cells/ $\mu$ L<br>Lymphocyte count $\geq$ 500/ $\mu$ L<br>Platelet count $\geq$ 100,000/ $\mu$ L<br>Hemoglobin $\geq$ 9.0 g/dL<br>Aspartate aminotransferase and alanine aminotransferase $<$ 100 U/L<br>Serum bilirubin $<$ 1.25 $\times$ ULN<br>Serum creatinine $<$ 1.5 $\times$ ULN |
| <b>Patients without malignancies other than SCLC within 5 years, with the exception of those with a negligible risk of metastasis or death treated with expected curative outcomes</b>                                                                                                                                                                                                                                                    |
| <b>Patients without a history of autoimmune diseases</b><br><br>Patients with a history of autoimmune-related hypothyroidism on thyroid replacement hormone therapy are eligible. Patients with controlled type I diabetes mellitus on an insulin regimen are eligible.                                                                                                                                                                   |
| <b>Patients without a history of interstitial lung diseases other than radiation pneumonitis</b>                                                                                                                                                                                                                                                                                                                                          |
| <b>Patients who did not receive treatment with systemic immunosuppressive medications</b>                                                                                                                                                                                                                                                                                                                                                 |
| <b>Patients without uncontrolled pleural effusion, pericardial effusion, or ascites requiring recurrent drainage procedures</b>                                                                                                                                                                                                                                                                                                           |

<sup>a</sup> Patients with untreated asymptomatic brain metastases are eligible in criteria 1 but ineligible in criteria 2

**Abbreviations:** ECOG, Eastern Cooperative Oncology Group; SCLC, small-cell lung cancer

**eTable 2. Treatment-related adverse events (AEs)**

| <b>Non-hematologic AEs, no. (%)</b> | <b>Grades 3–5</b> | <b>Grade 5</b>     |
|-------------------------------------|-------------------|--------------------|
| Any                                 | 64 (31)           | 4 <sup>a</sup> (2) |
| Event occurring in ≥3 patients, no. |                   |                    |
| Febrile neutropenia                 | 27 (13)           |                    |
| Pneumonitis                         | 7 (3)             | 2                  |
| Lung infection                      | 6 (3)             | 1                  |
| Skin disorders                      | 3 (1)             |                    |
| Nausea                              | 4 (2)             |                    |
| Alkaline phosphatase increased      | 3 (1)             |                    |
| Hyperglycemia                       | 3 (1)             |                    |
| Hyponatremia                        | 3 (1)             |                    |
| <b>Hematologic AEs, no. (%)</b>     | <b>Grades 4</b>   |                    |
| Any                                 | 73 (35)           |                    |
| Neutropenia                         | 70 (34)           |                    |
| Anemia                              | 0 (0)             |                    |
| Thrombocytopenia                    | 9 (4)             |                    |

<sup>a</sup> Including one hepatic failure.

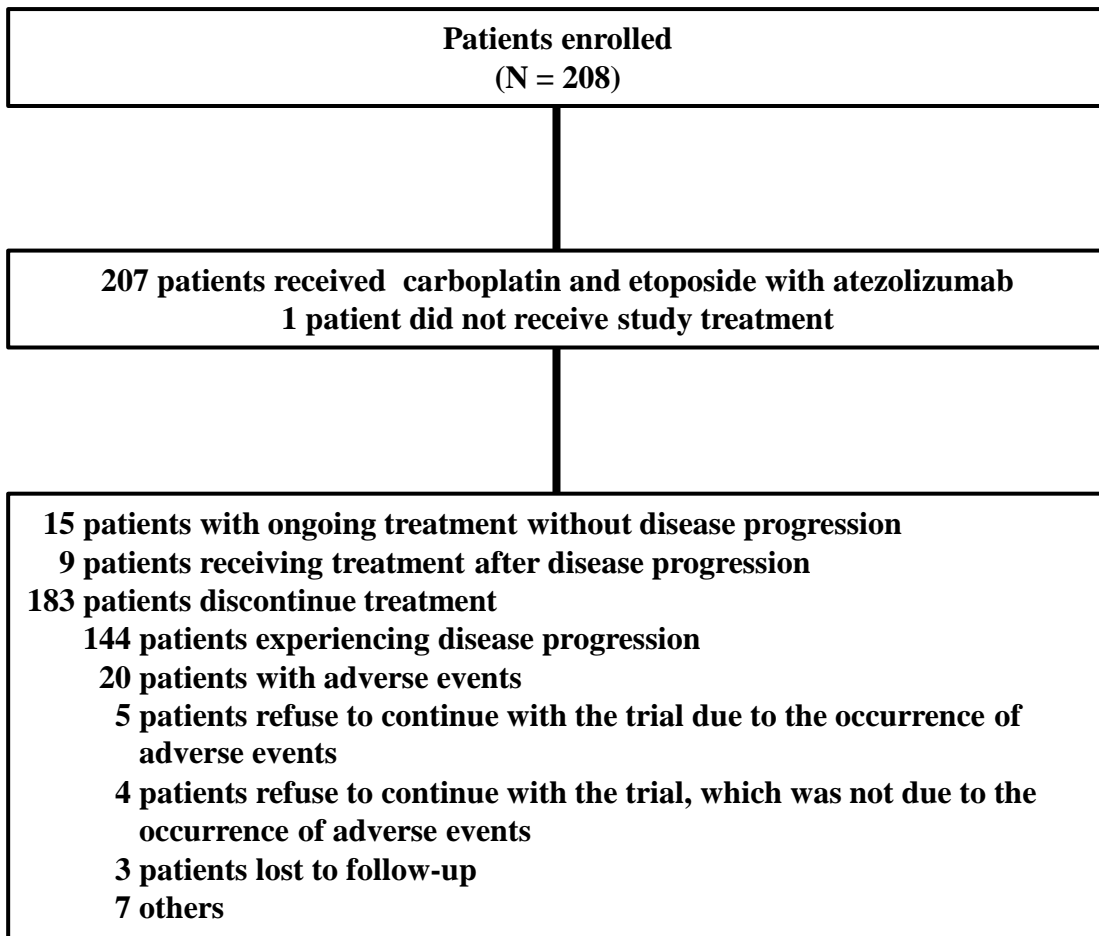

**eFigure1. Study profile.**

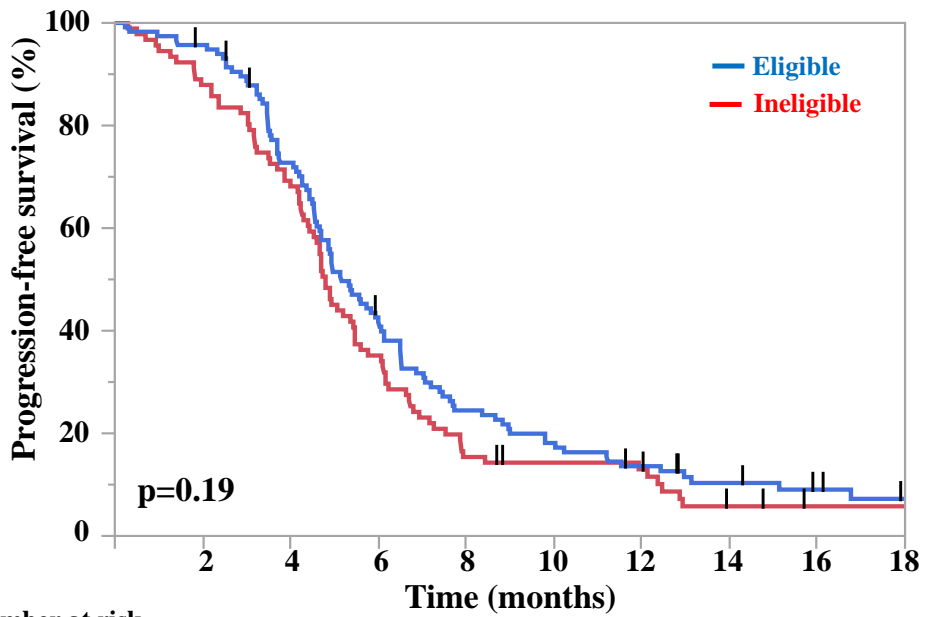

Number at risk

|            |     |     |    |    |    |    |    |   |   |   |
|------------|-----|-----|----|----|----|----|----|---|---|---|
| Eligible   | 116 | 110 | 82 | 46 | 27 | 20 | 14 | 9 | 6 | 3 |
| Ineligible | 91  | 80  | 62 | 32 | 14 | 11 | 10 | 3 | 1 | 1 |

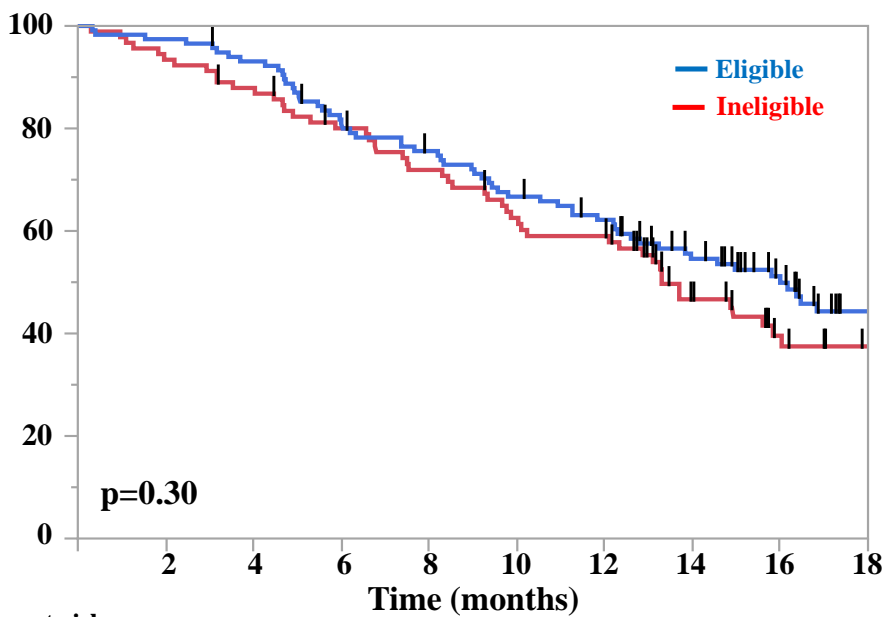

Number at risk

|            |     |     |     |    |    |    |    |    |    |    |
|------------|-----|-----|-----|----|----|----|----|----|----|----|
| Eligible   | 116 | 113 | 107 | 92 | 85 | 75 | 68 | 54 | 39 | 25 |
| Ineligible | 91  | 85  | 79  | 70 | 62 | 53 | 50 | 30 | 19 | 14 |

**eFigure 2. Kaplan–Meier survival curves. (A) Progression-free survival and (B) overall survival stratified by eligibility criteria 2.**

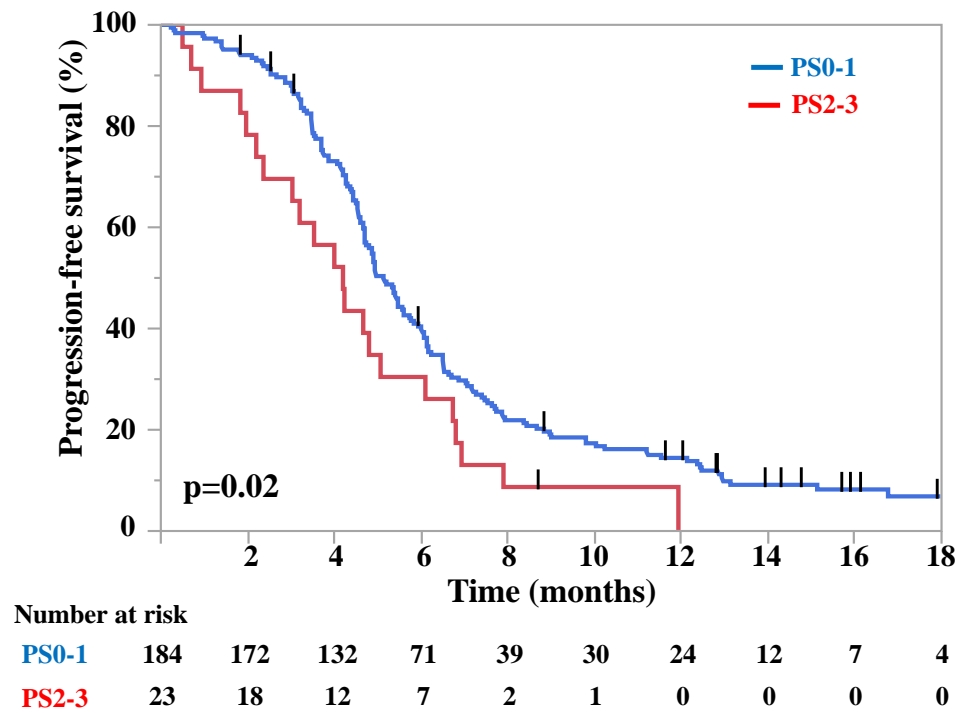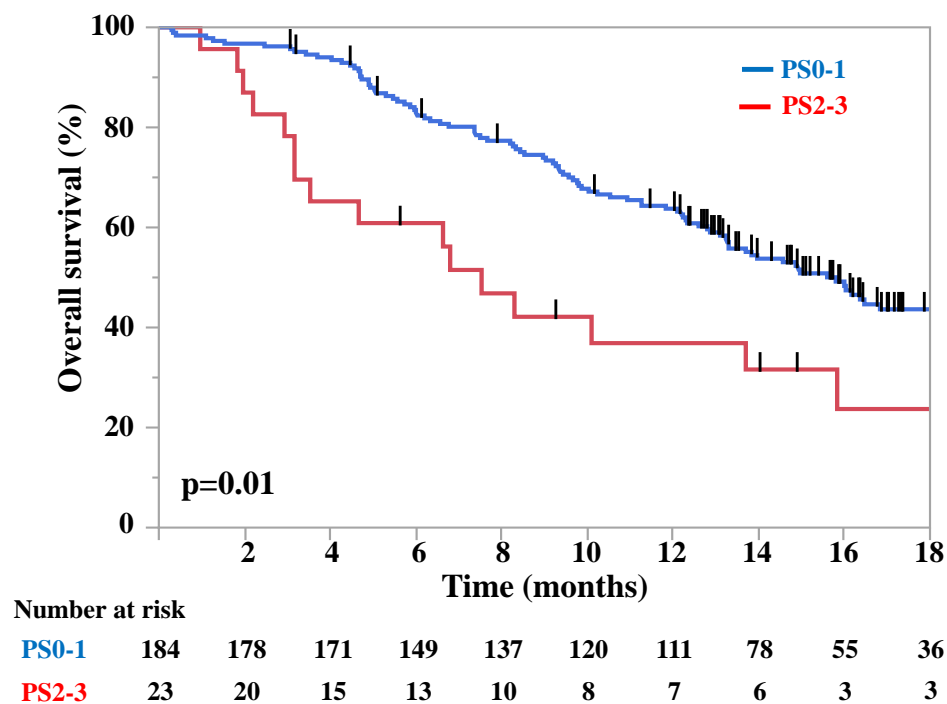

**eFigure 3. Kaplan–Meier survival curves. (A) Progression-free survival and (B) overall survival stratified by performance status (PS).**

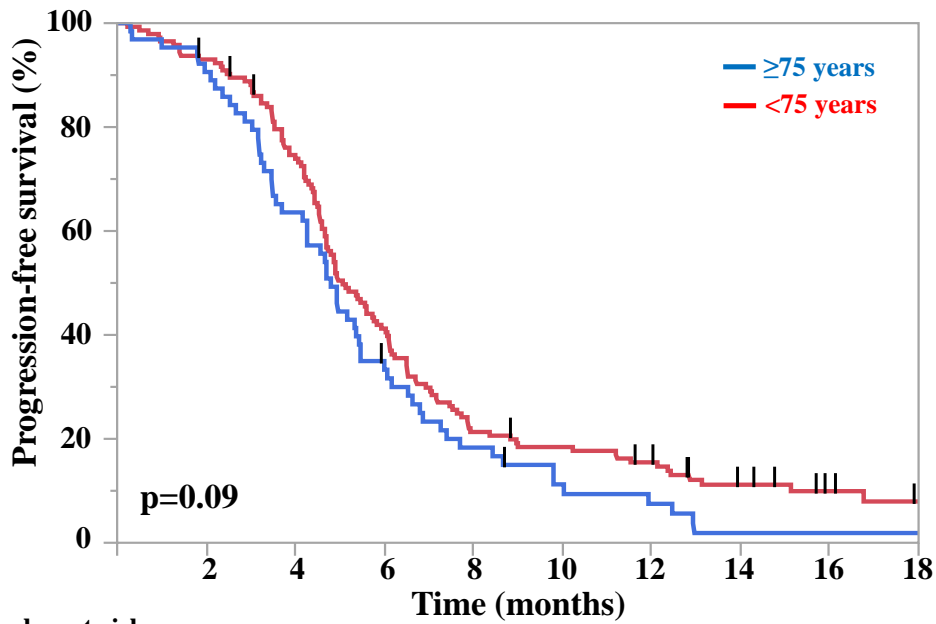

Number at risk

|                 | 0   | 2   | 4   | 6  | 8  | 10 | 12 | 14 | 16 | 18 |
|-----------------|-----|-----|-----|----|----|----|----|----|----|----|
| $\geq 75$ years | 64  | 57  | 40  | 20 | 11 | 6  | 4  | 1  | 1  | 1  |
| $< 75$ years    | 143 | 133 | 104 | 58 | 30 | 25 | 20 | 11 | 6  | 3  |

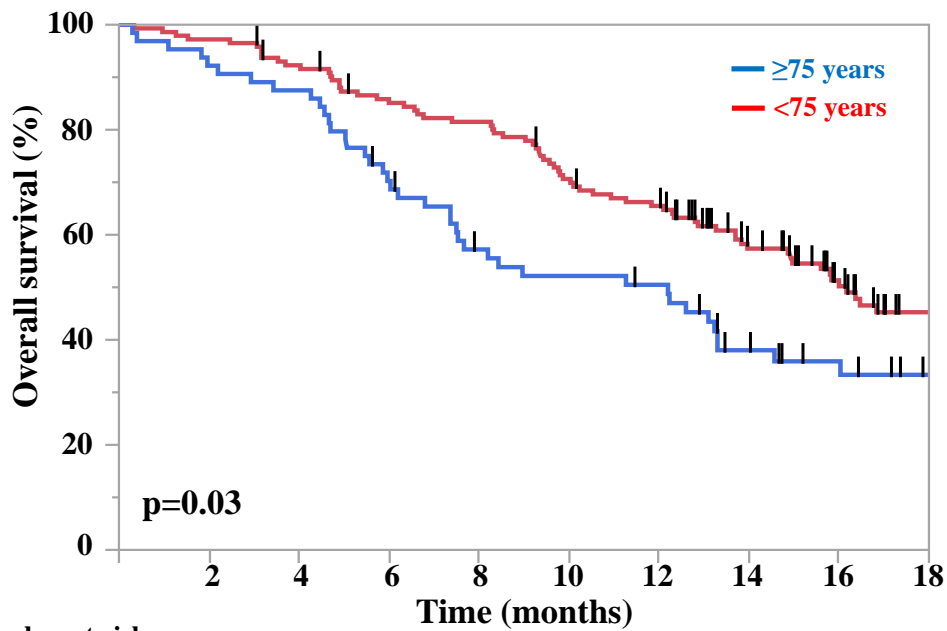

Number at risk

|                 | 0   | 2   | 4   | 6   | 8   | 10 | 12 | 14 | 16 | 18 |
|-----------------|-----|-----|-----|-----|-----|----|----|----|----|----|
| $\geq 75$ years | 64  | 59  | 56  | 44  | 34  | 31 | 29 | 19 | 14 | 9  |
| $< 75$ years    | 143 | 139 | 130 | 118 | 113 | 97 | 89 | 65 | 44 | 30 |

**eFigure 4. Kaplan–Meier survival curves. (A) Progression-free survival and (B) overall survival stratified by age.**
