# Supplementary material for: Outcomes of Chemoimmunotherapy Among Patients With Extensive-Stage Small Cell Lung Cancer According to Potential Clinical Trial Eligibility
Source: PubMed Central journal article supplement — JAMA Netw Open. 2023 Feb 24;6(2):e230698. doi: 10.1001/jamanetworkopen.2023.0698 (PMC9958526; doi:10.1001/jamanetworkopen.2023.0698), 2023-02-24
Supplement: jamanetwopen-e230698-s002.pdf [file jamanetwopen-e230698-s002.pdf]

## Data Sharing Statement

Fujimoto. Outcomes of Chemoimmunotherapy Among Patients With Extensive-Stage Small Cell Lung Cancer According to Potential Clinical Trial Eligibility. *JAMA Netw Open*. Published February 24, 2023. doi:10.1001/jamanetworkopen.2023.0698

### Data

**Data available:** Yes

**Data types:** Deidentified participant data

**How to access data:** [hiroakiakamatsu@gmail.com](mailto:hiroakiakamatsu@gmail.com)

**When available:** With publication

### Supporting Documents

**Document types:** None

### Additional Information

**Who can access the data:** Hiroaki Akamatsu

**Types of analyses:** For clinical study

**Mechanisms of data availability:** with investigator support, after approval of a proposal
